# Supplementary material
Source: Springer Nature journal article supplement (https://www.springermedizin.de/resource/supplementary/12916_2008_159_MOESM3_ESM.pdf/9599298)

**A.**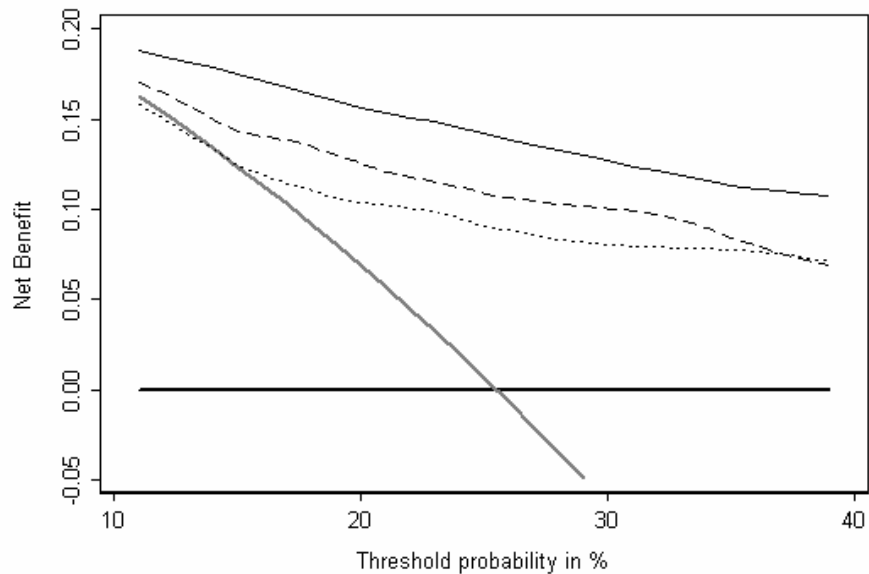**B.**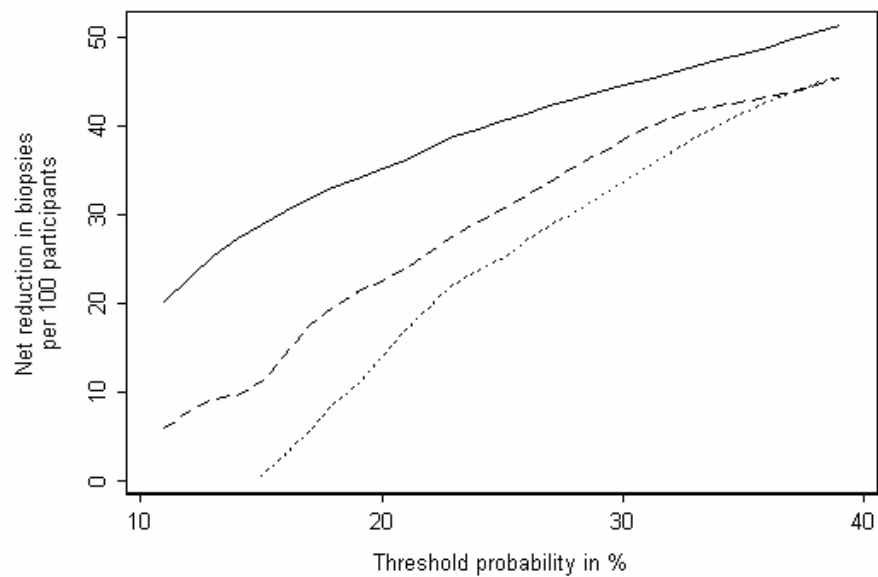

Supplement: MOESM3 [file 9599298]
